# Supplementary material for: Grapevine Red Blotch Disease Affects Carbohydrate Homeostasis and Cell Call Characteristics in Vitis Vinifera L.
Source: Research Square preprint supplement (doi:10.21203/rs.3.rs-428067/v1), 2021-04-21
Supplement: Supplementary file 2 [file dbb15d8d17a1136023075952.docx]

Figure S1.


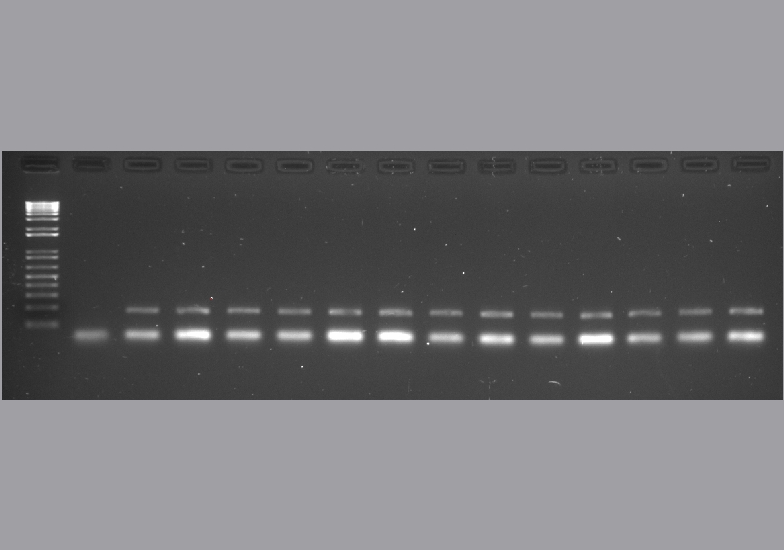

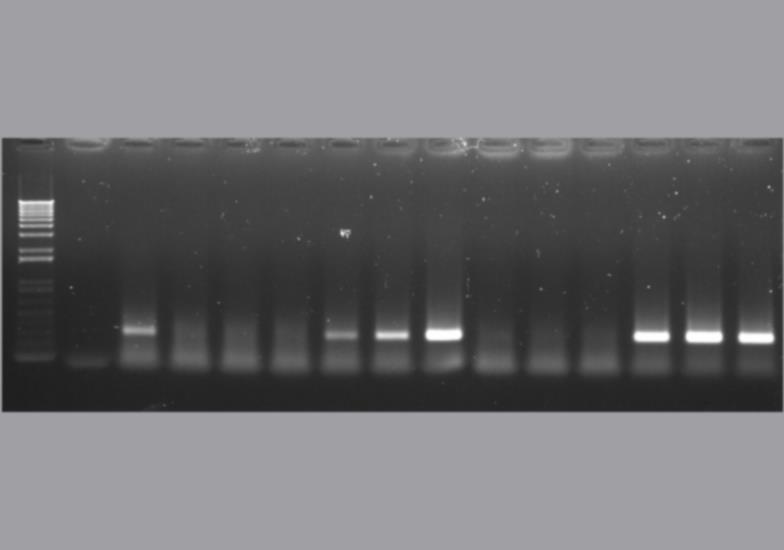

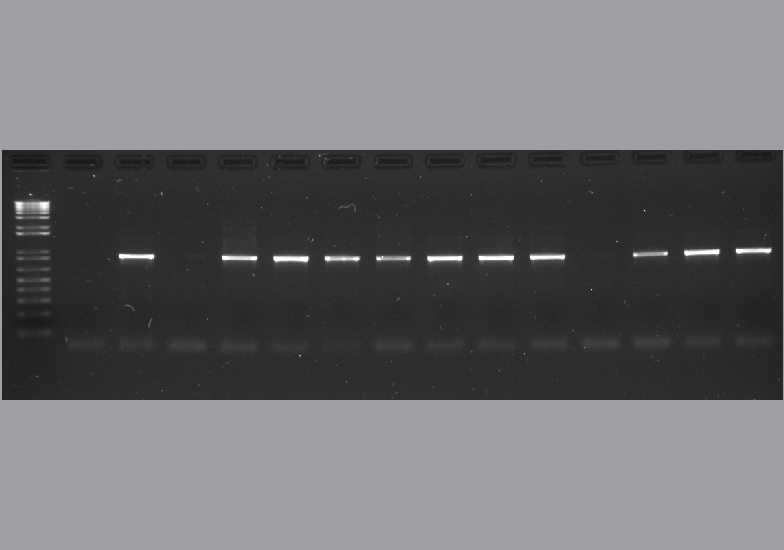

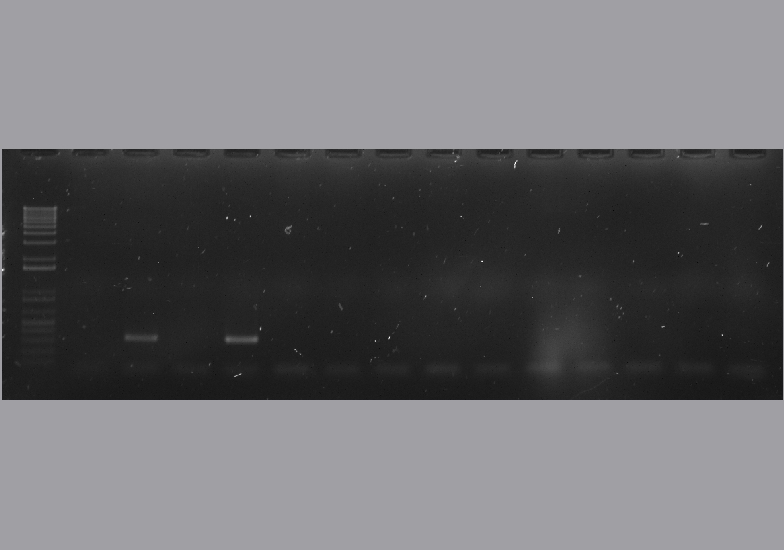

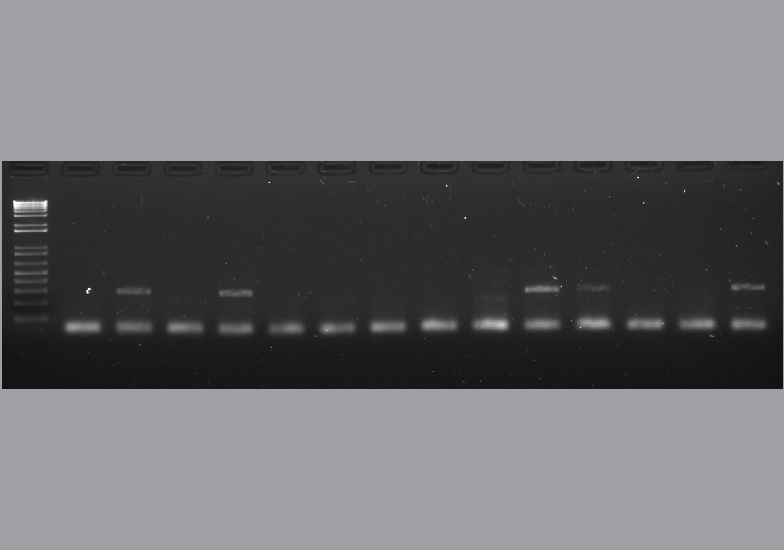


M -ve +ve asymptomatic symptomatic asymptomatic symptomatic

c.v. Merlot

c.v. Syrah

**NADH**

**GRBV**

**RSPV**

**GFLV**

**GSYV**
